# Supplementary material
Source: ML conference proceedings conference paper supplement (https://openreview.net/forum?id=hac6DzbMa7)
Supplement: supplementary_material [file attachment]

## Ethics and Reproducibility Statements

We have followed the ICLR Code of Ethics in our work.

For the reproducibility of the proposed STIL system, the source code can be downloaded from <https://github.com/STILalg/STIL>.

## Appendix

### CONTENTS

#### A. THEOREMS 1-4 AND PROOFS

A.1 Theorem 1

A.2 Theorem 2

A.3 Theorem 3

A.4 Theorem 4

#### B. NETWORK ARCHITECTURES, HYPERPARAMETERS, TRAINING DETAILS, AND DATASETS

#### C. ALGORITHMS

C.1 Algorithm 1 LWSimilarity

C.2 Algorithm 2 basesComputing

C.3 Algorithm 3 STIL

#### D. ADDITIONAL EXPERIMENTAL RESULTS

D.1 Efficiency and Memory Performance Comparisons

D.2 ACC and BWT Performances of STIL of Task-wise vs. Layer-wise

D.3 The Accuracy Evolution of Task  $t$  of STIL and Baselines

D.4 The KT Performance of STIL and Baselines on Mixed Tasks Datasets

D.5 The Number of Learnable Tasks of STIL and OG-based OWM

## A THEOREMS 1-4 AND PROOFS

**A.1 Theorem 1.** The learning of the new task  $t \leq T$  will not interfere with the knowledge (weights  $\mathbf{W}_{t-1}$ ) of the previous learned  $t - 1$  tasks (i.e., there is no CF) *if and only if* 1) task  $t$  occupies its own independent weight subspace  $\mathbf{W}_t$ , that is orthogonal to all other weight subspaces of the previous tasks in the whole weight space  $\mathcal{S}_w$  of the model, and 2) the modified weights spanned by the orthogonal gradient to the previous learned tasks are imposed in its weight subspace  $\mathbf{W}_t$  of task  $t$ .

### 1) Sufficiency

*Proof.* Given a DNN model, if  $\mathbf{W}_t$  and  $\mathbf{W}_{t-1}$  (i.e., weight matrices of task  $t$  and  $t - 1$ ) are orthogonal weight subspaces of the model after learning tasks  $t$  and  $t - 1$  respectively, and if the weight subspace spanned by  $\nabla \mathbf{W}_t$  is  $\mathbf{W}_t$  in learning task  $t$ , then Eq. (1) becomes Eq.(12) as follows:

$$\mathbf{W}_t^{i+1} = \mathbf{W}_t^i - \lambda \nabla \mathbf{W}_t^i, \lambda \nabla \mathbf{W}_t^i \in \mathbf{W}_t^i \quad (12)$$

where  $\lambda$  is the learning rate, and  $\mathbf{W}_t^{i+1}$  and  $\mathbf{W}_t^i$  are the  $(i + 1)$ th and  $i$ th iteration optimization results of the weight subspace in learning task  $t$  respectively. Eq.(12) means that  $\mathbf{W}_t$  has no interference with  $\mathbf{W}_{t-1}$  of the previous learned task  $t - 1$  in the new task  $t$  learning.  $\square$

### 2) Necessity

*Proof.* In learning a new task  $t$ , if there is no interference in  $\mathbf{W}_t$  and  $\mathbf{W}_{t-1}$ , i.e., no CF issue, which means  $\mathbf{W}_t \cdot \mathbf{W}_{t-1} = 0$  and the projection of  $\lambda \nabla \mathbf{W}_t$  on  $\mathbf{W}_{t-1}$  is zero, that is  $\mathbf{W}_{t-1}^i - \lambda \nabla \mathbf{W}_t^i = \mathbf{W}_{t-1}^i - 0$  ( $\lambda$  is the learning rate). Thus  $\mathbf{W}_{t-1}^i$  of task  $t - 1$  would not be changed in the learning of task  $t$ .  $\square$

**A.2 Theorem 2.** The upper bound of the minimum number of learnable tasks of method OWM (Zeng et al., 2019) is  $\text{rank}(P_{OWM})$ , which is the rank of the orthogonal projection operator  $P_{OWM}$  formulated as follows:

$$\text{rank}(P_{OWM}) = r, r \leq \text{rank}(\mathbb{W}) \leq \min(m, n) \quad (13)$$

where  $\mathbb{W} \in \mathbb{R}^{m \times n}$  is the weight matrix of the model, and  $\min(m, n)$  is the minimum value of the weight matrix dimensions. See OWM (Zeng et al., 2019) for proof.

**A.3 Theorem 3.** The upper bound of the minimum number of learnable tasks of the proposed OIWS-based TIL method is  $\sum_{t=1}^T \text{rank}(\mathbf{B}_t) \gg \min(m, n)$ , where  $\text{rank}(\mathbf{B}_t)$  is the rank of the bases  $\mathbf{B}_t = \{\mathbf{B}_t^l\}_{l=1}^L$  (see Eq. (21)) of the weight subspace of task  $t$ .

*Proof.* Based on the optimization theory (Saad, 2003; Shah et al., 1992), as  $1 < \text{rank}(\mathbf{B}_t) \leq \min(m, n)$  ( $t \in [1, T]$ ) and  $\text{rank}(\mathbf{B}_t)$  will increase with the learning of more tasks, the upper bound of the minimum number of learnable tasks of the proposed OIWS-based TIL method is at least

$$\sum_{t=1}^T \text{rank}(\mathbf{B}_t) > 1 + 2 + \dots + \min(m, n) = T(2 + \min(m, n))/2 \gg \min(m, n), T \gg 2 \quad (14)$$

where  $T$  is the total member of the learned tasks.  $\square$

**A.4 Theorem 4.** The theoretical bounds for FWT and BWT of tasks  $i$  and  $t$  ( $i < t, i \in [1, T - 1], t \in [2, T]$ ) in TIL are as follows.

$$\begin{cases} \text{FWT} : \epsilon_t(h) \leq \epsilon_i(h) + d(\mathcal{D}'_i, \mathcal{D}'_t) + \min\{\mathbb{E}_{\mathcal{D}'_{t-1}}[|l_i(\mathbf{x}) - l_t(\mathbf{x})|], \mathbb{E}_{\mathcal{D}'_t}[|l_i(\mathbf{x}) - l_t(\mathbf{x})|]\} \\ \text{BWT} : \epsilon_i(h) \leq \epsilon_t(h) + d(\mathcal{D}'_i, \mathcal{D}'_t) + \min\{\mathbb{E}_{\mathcal{D}'_i}[|l_i(\mathbf{x}) - l_t(\mathbf{x})|], \mathbb{E}_{\mathcal{D}'_t}[|l_i(\mathbf{x}) - l_t(\mathbf{x})|]\} \end{cases}$$

*Proof.* Recall that  $\epsilon_t(h) = \epsilon_t(h, l_t)$  and  $\epsilon_i(h) = \epsilon_i(h, l_i)$ . Let  $g_i$  and  $g_t$  be the density functions of  $\mathcal{D}'_i$  and  $\mathcal{D}'_t$  respectively. For the theoretical bound of FWT,

$$\begin{aligned}
\epsilon_t(h) &= \epsilon_t(h) + \epsilon_i(h) - \epsilon_i(h) + \epsilon_i(h, l_t) - \epsilon_i(h, l_t) \\
&\leq \epsilon_i(h) + |\epsilon_i(h, l_t) - \epsilon_i(h, l_i)| + |\epsilon_t(h, l_t) - \epsilon_i(h, l_t)| \\
&\leq \epsilon_i(h) + \mathbb{E}_{\mathcal{D}'_i}[|l_i(\mathbf{x}) - l_t(\mathbf{x})|] + |\epsilon_t(h, l_t) - \epsilon_i(h, l_t)| \\
&\leq \epsilon_i(h) + \mathbb{E}_{\mathcal{D}'_i}[|l_i(\mathbf{x}) - l_t(\mathbf{x})|] + \int |g_i(\mathbf{x}) - g_t(\mathbf{x})| |h(\mathbf{x}) - l_t(\mathbf{x})| d\mathbf{x} \\
&\leq \epsilon_i(h) + \mathbb{E}_{\mathcal{D}'_i}[|l_i(\mathbf{x}) - l_t(\mathbf{x})|] + d_1(\mathcal{D}'_i, \mathcal{D}'_t).
\end{aligned} \tag{15}$$

For the theoretical bound of BWT, in the first line of the above Eq. (15), we could instead choose to add and subtract  $\epsilon_t(h, l_t)$  rather than  $\epsilon_i(h, l_t)$ , which would result in the same bound only with the expectation taken with respect to  $\mathcal{D}'_t$  instead of  $\mathcal{D}'_i$ . Choosing the smaller of the two gives us the bound of BWT.  $\square$

## B NETWORK ARCHITECTURES, HYPERPARAMETERS, TRAINING DETAILS, AND DATASETS

**Network Architectures and hyperparameters.** To test the efficacy and scalability of our method, we use various DNN models/backbones on the 11 benchmark datasets. We use a 3-layer fully connected network (FCN) with two hidden layers of 100 units each for PMINIST, F-CelebA-1, F-CelebA-2, (EMNIST, F-EMNIST-1) and (CIFAR 100, F-CelebA-1) following (Lopez-Paz & Ranzato, 2017) and (LeCun et al., 1998). For experiments with CIFAR 100 we use a 5-layer AlexNet similar following (Serrà et al., 2018). For experiments with CIFAR-100 Sup, we use a 5-layer LeNet-5 (Yoon et al., 2020). For experiments with MiniImageNet, 5-Datasets, F-EMNIST-1 and F-EMNIST-2, similar to (Chaudhry et al., 2019), we use a reduced ResNet-18 architecture. No bias units and batch normalization parameters are learned for the first task and shared with all the other tasks following (Mallya & Lazebnik, 2018). For PMINIST, F-CelebA-1 and F-CelebA-2, we evaluate and compare our STIL in the ‘single-head’ setting (Hsu et al., 2018; Farquhar & Gal, 2018) where all tasks share the final classifier layer and inference is performed without task hint. For all other experiments, we evaluate our STIL in the ‘multi-head’ setting, where each task has a separate head or classifier. The correspondence between the training dataset and its network structure, as well as the training hyperparameters used by each network structure, are shown in Table 4.

**Datasets Details.** Eleven benchmark image classification datasets are used in our experiments, which are divided into the following categories:

–**Dissimilar tasks datasets.** (1.1). PMNIST (Permuted MNIST, 10 tasks) (Lecun et al., 1998). It is a variant of MNIST dataset where each task is considered as a random permutation of the original MNIST pixels. We create 10 sequential tasks using different permutations where each task has 10 classes. (1.2). CIFAR-100 (10 tasks) (Krizhevsky & Hinton, 2009). It is constructed by randomly splitting 100 classes of CIFAR-100 (Krizhevsky & Hinton, 2009) into 10 tasks with 10 classes per task. (1.3). CIFAR 100 Sup (20 tasks) (Krizhevsky & Hinton, 2009): It is constructed by splitting 100 classes of CIFAR 100 into 20 tasks with 5 classes of the same attributes per task. (1.4). MiniImageNet (20 tasks) (Vinyals et al., 2016): It is constructed by splitting 100 classes of miniImageNet into 20 sequential tasks where each task has 5 classes. (1.5). 5-Datasets (5 tasks) (Ebrahimi et al., 2020): It includes CIFAR-10, MNIST, SVHN (Netzer et al., 2011), notMNIST (Bulatov, 2011) and Fashion MNIST (Xiao et al., 2017), where the classification of each dataset is considered as a task.

–**Similar tasks datasets.** (2.1) F-EMINIST-1 and (2.2) F-EMINIST-2 (10/35 tasks). They are similar task datasets from *federated learning*, which are constructed by randomly choosing 10/35 tasks from two publicly available federated learning datasets (Caldas et al., 2018). (2.3) F-CelebA-1 and (2.4) F-CelebA-2 (10/20 tasks). They are also similar task datasets from *federated learning*, which are constructed by randomly choosing 10/20 tasks from two publicly available federated learning datasets (Caldas et al., 2018). Each of the 10/20 tasks contains images of a celebrity labeled by whether he/she is smiling or not. Note that for the four datasets (2.1)-(2.4), the training and testing sets are already provided in (Caldas et al., 2018). We further split about 10% of the original training set and kept it for validation purposes.

–**Mixed tasks datasets.** (3.1) (EMNIST, F-EMNIST-1) (20 tasks). It is a randomly mixed similar and dissimilar task sequences constructed from EMNIST (LeCun et al., 1998) and F-EMNIST-1. (3.2) (CIFAR-100, F-CelebA-1)(20 tasks). It is a randomly mixed similar and dissimilar task sequences constructed from CIFAR-100 (10 tasks) and F-EMNIST-1 (10 tasks).

The sample sizes of the training/validation/testing are as follows: (1.1) PMNIST 6000 / 300 / 700, (1.2) CIFAR100 5000/300/700, (1.3) CIFAR 100 Sup 5000 / 300 / 700, (1.4) MiniImageNet 5000 / 200 / 800, and (1.5) 5-Datasets, which. It has 5 tasks in total, and the samples of per task are 50000 / 10000 / 10000, 50000 / 10000 / 10000, 63257 / 10000 / 26032, 50000 / 10000 / 10000, and 10000/6854/1872 respectively.

**Running Environment.** All of the experiments were conducted on the platform: Intel(R) Xeon(R) Gold 6230 CPU 2.10GHz, 251GB RAM, and GPU - GeForce RTX 2080 Ti with 12GB MC (graphics card Memory Capacity). And all the experimental results are standard deviation values over 5 different runs with the random seeds.

Table 4: Datasets, network architectures and hyperparameters.

| Datasets                | Backbone     | Batch Size | Epochs | $\lambda$ | Optimizer | $\epsilon_t^l$      | $\theta$ |
|-------------------------|--------------|------------|--------|-----------|-----------|---------------------|----------|
| PMNIST                  | 3-Layers FCN | 10         | 5      | 0.01      | SGD       | 0.95/ 0.99/ 0.99    | 0.75     |
| CIFAR 100               | AlexNet      | 64         | 100    | 0.01      | SGD       | 0.97 in all layers  | 0.75     |
| CIFAR 100 Sup           | LeNet-5      | 64         | 100    | 0.01      | SGD       | 0.98 in all layers  | 0.75     |
| MiniImageNet            | ResNet 18    | 64         | 200    | 0.10      | SGD       | 0.985 in all layers | 0.80     |
| 5-Datasets              | ResNet 18    | 64         | 100    | 0.10      | SGD       | 0.965 in all layers | 0.95     |
| F-EMNIST-1              | ResNet 18    | 64         | 50     | 0.10      | SGD       | 0.965 in all layers | 0.80     |
| F-EMNIST-2              | ResNet 18    | 64         | 50     | 0.10      | SGD       | 0.965 in all layers | 0.80     |
| F-CelebA-1              | 3-Layers FCN | 64         | 50     | 0.01      | SGD       | 0.95/ 0.99/ 0.99    | 0.75     |
| F-CelebA-2              | 3-Layers FCN | 64         | 50     | 0.01      | SGD       | 0.95/ 0.99/ 0.99    | 0.70     |
| (EMNIST, F-EMNIST-1)    | 3-Layers FCN | 64         | 50     | 0.01      | SGD       | 0.95/ 0.99/ 0.99    | 0.70     |
| (CIFAR 100, F-CelebA-1) | 3-Layers FCN | 64         | 50     | 0.01      | SGD       | 0.95/ 0.99/ 0.99    | 0.70     |

<sup>1</sup>  $\epsilon_t^l$  is a feasible empirical threshold for the matrix approximation in Eq. (18), and  $\theta$  is the distance threshold in Eq.(11) on each dataset.

## C ALGORITHMS

**C.1 Algorithm 1 LWSimilarity.** It calculates the layer-wise similarity between tasks  $i$  and  $t$  shown in **Step 4**, Sec.4.3, which is as follows:

- (1) Feeding the sampled replay data  $\mathbb{D}'$  into  $model_{ori}$  and  $model_{CL}$  sequentially to obtain their corresponding layer-wise **representations**  $\{x_j^l\}$  and  $\{x_j^l\}$  of  $model_{ori}$  and  $model_{CL}$ , respectively, where  $j \in [1, t]$  and  $l \in [1, L - 1]$ .
- (2) Calculating the layer-wise similarity between tasks  $i$  and  $t$  by metric  $SDM$  (Eq. 11). Note that in this case, the distance in Eq.(10) corresponds to the distance between the **representations** of tasks  $i$  and  $t$ .
- (3) Outputting the results of the layer-wise similarities between tasks  $i$  and  $t$  ( $i \in [1, t - 1]$ ) to Similar Task Processing shown in Figure 1(a). Note that the layer-wise similarity may select different tasks for different layers, which provides a more fine-grained characterization of task similarity in terms of layer-level features of the model (see Table 6).

### C.2 Algorithm 2 basesComputing

**Definition 1 (Layer-wise representation and representation matrix  $R_t^l$ ).** Given a DNN model with  $L$  layers, for the input data  $x_{t,i}$  of task  $t$ , denote  $x_{t,i}^l$  as the input of layer  $l$ , namely the **representation** of  $x_{t,i}$  at layer  $l$ , and  $x_{t,i}^1 = x_{t,i}$ . The output  $x_{t,i}^{l+1}$  for layer  $l$  is computed by  $x_{t,i}^{l+1} = f(W_t^l, x_{t,i}^l)$ , where  $f(\cdot)$  is the mapping function of the network layer. When learning task  $t$ , we only have access to dataset  $\mathbb{D}_t$ . The **representation matrix** of layer  $l$  is defined as  $R_t^l = [x_{t,1}^l, x_{t,2}^l, \dots, x_{t,n_s}^l]$  for task  $t$ , which can be constructed by concatenating  $n_s$  (which is a number of sampled data from the training

**Algorithm 1** LWSimilarity**Input:** The validation dataset  $\mathbb{D}'$ ; the original model  $model_{ori}$  and learning model  $model_{CL}$  of STIL;**Output:** The set  $\{\mathbb{T}_{sim}^l\}_{l=1}^{L-1}$  of similar tasks between task  $t$  and previously learned  $(t-1)$  tasks;

---

```

1: for each task  $j \in [1, t]$  do
2:   Feeding the validation dataset  $\mathbb{D}'_j$  into  $model_{ori}$  and  $model_{CL}$ , respectively, before learning task  $t$ ;
3:   for each layer  $l \in [1, L - 1]$  do
4:     Calculating the layer-wise representations  $\{x_j^l\}$  and  $\{x_j^l\}$  of  $model_{ori}$  and  $model_{CL}$ , respectively;
5:   end for
6: end for
7: for each layer  $l \in [1, L - 1]$  do
8:    $\mathbb{T}_{sim}^l \leftarrow \emptyset$ ;
9: end for
10: for each task  $i \in [1, t - 1]$  do
11:   for each layer  $l \in [1, L - 1]$  do
12:     Calculating the  $dis'$  and  $dis$  between tasks  $i$  and  $t$  by Wasserstein distance (Panaretos & Zemel, 2019) and Eq. (10);
13:     // judging the similarity between tasks  $i$  and  $t$  by metric SDM shown in Eq. (11);
14:     if  $dis < dis'$  and  $|dis - dis'| < \theta$  then
15:        $\mathbb{T}_{sim}^l \leftarrow \mathbb{T}_{sim}^l \cup i$ ;
16:     end if
17:   end for
18: end for
19: return  $\{\mathbb{T}_{sim}^l\}_{l=1}^{L-1}$ ;

```

---

**Algorithm 2** basesComputing**Input:** The training data  $\mathbb{D}_t$  of learning task  $t$ ;**Output:** The layer-wise bases  $\mathbf{b}_t^l$  of task  $t$  and common bases  $\mathbf{B}_t^l$  between task  $t$  and previously learned  $t - 1$  tasks

---

```

1:  $\{\mathbf{b}_t^l\} \leftarrow \emptyset, \{\mathbf{B}_t^l\} \leftarrow \emptyset$ ;
2: for each layer  $l \in [1, L]$  do
3:   Calculating its layer-wise representation matrix  $\mathbf{R}_t^l$  after learning task  $t$  (see Def.1);
4:   if  $t == 1$  then
5:     Calculating the SVD result of  $\mathbf{R}_t^l$  by Eq.(17);
6:     Calculating the  $k$ -rank approximation  $(\mathbf{R}_t^l)_k$  of  $\mathbf{R}_t^l$  by Eq. (18);
7:     Selecting the top- $k$  vectors of  $\mathbf{U}_t^l$  from  $(\mathbf{R}_t^l)_k$  to construct  $\mathbf{b}_t^l$ ;
8:      $\mathbf{B}_t^l \leftarrow \mathbf{b}_t^l$ ;
9:   else
10:    Calculating the orthogonal projection  $\hat{\mathbf{R}}_t^l$  of  $\mathbf{R}_t^l$  by Eq.(19);
11:    Calculating the SVD result of  $\hat{\mathbf{R}}_t^l$  by Eq.(17);
12:    The  $k$  new orthogonal bases for the minimum value of  $k$  is selected for satisfying Eq. (20);
13:    Selecting the top- $k$  vectors of  $\hat{\mathbf{U}}_t^l$  from  $(\hat{\mathbf{R}}_t^l)_k$  to construct  $\mathbf{b}_t^l$ ;
14:     $\{\mathbf{b}_t^l\} \leftarrow \{\mathbf{b}_t^l\} \cup \mathbf{b}_t^l$ ;
15:    Calculating the common bases  $\mathbf{B}_t^l$  of task  $t$  and previously learnt  $t - 1$  tasks by Eq. (21)
16:     $\{\mathbf{B}_t^l\} \leftarrow \{\mathbf{B}_t^l\} \cup \mathbf{B}_t^l$ ;
17:   end if
18: end for
19: Storing  $\{\mathbf{b}_t^l\}$  and  $\{\mathbf{B}_t^l\}$  to the KB of STIL;
20: return  $\{\mathbf{B}_t^l\}$ ;

```

---

dataset) representations along the column obtained from the forward pass of  $n_s$  random samples from the current training dataset through the model after learning task  $t$ .

**Definition 2** ( $\mathbf{S}_{KG}$  and  $\mathbf{S}_{RG}$ ). Given a gradient space  $\mathbf{S}_g$  for a DNN model, we divide  $\mathbf{S}_g$  into two orthogonal subspaces: Core/Key Gradient Space (denoted by  $\mathbf{S}_{KG}$ ) and Residual Gradient Space

(denoted by  $S_{RG}$ ).  $S_{KG}$  and  $S_{RG}$  have the properties: (1) they are orthogonal and complementary subspaces to each other, and (2) let  $S_{KG}$  be the gradient subspace spanned by important gradients of previously learned  $t - 1$  tasks. So, for a new task  $t$  learning, its gradient steps along  $S_{KG}$  would induce a high level of interference on the learned tasks, whereas gradient steps along  $S_{RG}$  have minimum CF on the learned tasks.

The calculation process of the Algorithm 2 basesComputing is as follows.

Computing the layer-wise  $B_t^l$  bases of the **space  $S^l$  of significant representation** corresponding to the  $S_{KG}$  of task  $t$ . In proposed STIL,  $B_1^l$  and  $B_t^l$  ( $t \in [2, T]$ ) are calculated differently as follows:

**Calculating  $B_1^l$ .** After learning task 1, first, a layer-wise **representation matrix**  $\{R_t^l\}_{l=1}^L$  ( $t = 1$ , see Def. 1) is constructed using dataset  $\mathbb{D}_1$  for each layer of the model with  $L$  layers. Second, the SVD on  $R_t^l = U_t^l \Sigma_t^l (V_t^l)^\top$  ( $\in \mathbb{R}^{m \times n}$ ) by Eq.(17) is calculated. Here, we employ the property of  $U_t^l$  and  $V_t^l$  being orthogonal to each other to get the two orthogonal submatrices of  $R_t^l$ , which is corresponding to the original subspaces  $S_{KG}$  and  $S_{RG}$ , respectively. Third, the  $k$ -rank approximation  $(R_t^l)_k$  of  $R_t^l$  by Eq. (18) is calculated with as little loss of information as possible. As the dimensions  $m$  and  $n$  of  $R_t^l$  may be very large, this step can avoid subsequently very complicated matrix operations. In this paper, let  $\epsilon_t^l$  be a hyperparameter of the model shown in Table 4 in Appendix C, which is a feasible empirical value. Based on the  $(R_t^l)_k$ , the **space  $S^l$  of significant representation** for task  $t$  at layer  $l$  can be derived by Eq. (16), i.e.,  $B_t^l = b_t^l = \{u_{t,1}^l, u_{t,2}^l, \dots, u_{t,j}^l, \dots, u_{t,k}^l\}$  ( $t = 1$ ).

$$S^l = \text{span}(b_t^l = \{u_{t,1}^l, u_{t,2}^l, \dots, u_{t,j}^l, \dots, u_{t,k}^l\}), u_{t,j}^l \in U_t^l \in (R_t^l)_k, j \in [1, k] \quad (16)$$

**Calculating  $B_t^l$  ( $t \in [2, T]$ ).** For clarity, we first introduce following definitions.

**Definition 3 (The SVD of  $R_t^l$ ).** Based on Singular Value Decomposition (SVD) (Deisenroth et al., 2020), the SVD of  $R_t^l$  for task  $t$  is defined as:

$$R_t^l = U_t^l \Sigma_t^l (V_t^l)^\top, R_t^l \in \mathbb{R}^{m \times n}, l \in [1, L] \quad (17)$$

where  $U_t^l$  and  $V_t^l$  are left and right singular value matrices which are orthogonal to each other, and  $\Sigma_t^l$  contains the singular values along its main diagonal. If the rank of matrix  $R_t^l$  is  $r$  ( $r \leq \min(m, n)$ ),  $R_t^l$  can be expressed as  $R_t^l = \sum_{i=1}^r \sigma_i u_i v_i^\top$ , where  $u_i \in U_t^l$  and  $v_i \in V_t^l$  are left and right singular vectors and  $\sigma_i \in \text{diag}(\Sigma_t^l)$  are singular values.

**Definition 4 (The  $k$ -rank approximation of  $R_t^l$  for task  $t$ .)** With the matrix approximation (Hadsell et al., 2006), the  $k$ -rank approximation of  $R_t^l$  is defined as:

$$\|(R_t^l)_k\|_F^2 \geq \epsilon_t^l \|R_t^l\|_F^2, l \in [1, L] \quad (18)$$

where  $\|\cdot\|_F$  is the Frobenius norm of the matrix and  $\epsilon_t^l \in (0, 1]$  is a feasible empirical threshold.

The calculations of  $B_t^l$  ( $t \in [2, T]$ ) are performed as follows. First, the layer-wise representation matrix  $\{R_t^l\}_{l=1}^L$  is constructed using dataset  $\mathbb{D}_t$  after learning task  $t$  only. Second, the orthogonal projection  $\hat{R}_t^l$  of  $R_t^l$  for task  $t$  is calculated as follows:

$$\hat{R}_t^l = R_t^l - R_t^l B_{t-1}^l (B_{t-1}^l)^\top = R_t^l - R_{t,Proj}^l \quad (19)$$

Third, the SVD on  $\hat{R}_t^l$  is calculated by Eq. (17) and the  $k$  new orthogonal bases for the minimum value of  $k$  are selected for satisfying the following inequality:

$$\|R_{t,Proj}^l\|_F^2 + \|(\hat{R}_t^l)_k\|_F^2 \geq \epsilon_t^l \|R_t^l\|_F^2 \quad (20)$$

where the  $\epsilon_t^l$  is a superparameter of the model shown in Table 4.

Forth, based on the calculated  $(\hat{R}_t^l)_k$  by Eq. (20), the layer-wise bases  $b_t^l = \{\hat{u}_{t,1}^l, \hat{u}_{t,2}^l, \dots, \hat{u}_{t,k}^l\}$  ( $l \in [1, L]$ ) of task  $t$  is obtained and stored to KB of STIL. As the common bases  $B_t^l$  of both  $B_{t-1}^l$  and  $b_t^l$  must be updated to ensure the newly added bases are unique and orthogonal to the existing bases  $B_{t-1}^l$ , the new bases  $b_t^l$  is added to  $B_{t-1}^l$  as follows for next iteration:

$$B_t^l = \{B_{t-1}^l, b_t^l\}, l \in [1, L] \quad (21)$$

**C.3 Algorithm 3 STIL.** See Figure 1(a) for the calculation procedure of Algorithm 3 STIL, and the STIL source code is available at <https://github.com/STILalg/STIL>.

**Algorithm 3** STIL

**Input:** The training dataset  $\mathbb{D} = \{\mathbb{D}_t\}_{t=1}^T$ ; the original model  $model_{ori}$  and learning model  $model_{CL}$  of STIL; **Output:** The learned model  $model_{CL}$  after learning all tasks;

```

1: for each task  $t \in [1, T]$  do
2:   Generating the validation dataset  $\mathbb{D}'_t$  of  $\mathbb{D}_t$  online by Online Validation Dataset Generator
   of STIL;
3:   if  $t == 1$  then
4:     Training  $model_{CL}$  on  $\mathbb{D}_t$  by using the cross-entropy loss function without imposing any
     constraint on weight updates of the model;
5:   else
6:     Calculating the layer-wise OIWS:  $\mathbf{W}_t^l$  of task  $t$  by  $\mathbf{W}_t^l = \mathbf{W}_{t-1}^l - \mathbf{W}_{t-1}^l \mathbf{B}_{t-1}^l (\mathbf{B}_{t-1}^l)^\top$  in
      $model_{CL}$ ;
7:      $\{\mathbb{T}_{sim}^l\}_{l=1}^{L-1} \leftarrow$  Calculating the layer-wise similar/dissimilar tasks between task  $t$  and
     previously learnt  $t-1$  tasks by Algorithm 1 LWSimilarity embedded in Similar/Dissimilar
     Tasks Detector of STIL;
8:     if  $\{\mathbb{T}_{sim}^l\}_{l=1}^{L-1} == \emptyset$  then
9:       Setting cross entropy  $\mathcal{L}_{dis}$  calculated as the loss function of  $model_{CL}$ ;
10:    else
11:      Setting  $\mathcal{L}_{sim}$  calculated by Eq. (9) as the loss function of  $model_{CL}$  for preparing
      knowledge transfer (KT);
12:    end if
13:    Training  $model_{CL}$  on  $\mathbb{D}_t$  with Similar/Dissimilar Tasks Processor of STIL, where the
    learning takes the gradients of task  $t$  in the directions orthogonal to  $S_{KG}$  of the previous  $t-1$ 
    tasks by Eq. (6) to avoid CF, and performs weight updates of the model by Eq. (7);
14:  end if
15:  Calculating the layer-wise common bases  $\{\mathbf{B}_t^l\}$  between task  $t$  and previously learned  $t-1$ 
    tasks by Algorithm 2 basesComputing for next new task learning;
16: end for
17: return  $model_{CL}$ ;

```

Table 5: The efficiency and memory comparisons of STIL and state-of-the-art KT baselines.

| Datasets              | OWM   |       | GPM          |             | CAT   |      | TRGP  |       | CUBER |       | STIL(Ours)  |             |
|-----------------------|-------|-------|--------------|-------------|-------|------|-------|-------|-------|-------|-------------|-------------|
|                       | T(S)  | M(G)  | T(S)         | M(G)        | T(S)  | M(G) | T(S)  | M(G)  | T(S)  | M(G)  | T(S)        | M(G)        |
| PMNIST                | 18.15 | 5.12  | <b>10.17</b> | 1.29        | 15.32 | 3.92 | 13.22 | 1.36  | 16.68 | 1.52  | 10.67       | <b>0.80</b> |
| CIFAR100              | 24.85 | 15.63 | 2.51         | 1.59        | 3.28  | 4.22 | 2.82  | 1.91  | 2.91  | 2.11  | <b>2.02</b> | <b>1.12</b> |
| CIFAR100 Sup          | –     | –     | 1.59         | 1.53        | 2.41  | 4.22 | 1.62  | 1.61  | 1.87  | 1.92  | <b>1.31</b> | <b>1.24</b> |
| MiniImageNet          | –     | –     | 3.52         | 1.91        | 3.54  | 4.41 | 4.72  | 2.97  | 5.53  | 3.53  | <b>2.43</b> | <b>1.86</b> |
| 5-Datasets            | –     | –     | 14.74        | 8.49        | 12.54 | 4.22 | 15.73 | 11.58 | 26.64 | 13.11 | <b>7.10</b> | <b>6.89</b> |
| F-EMNIST-1            | –     | –     | <b>1.08</b>  | <b>1.06</b> | 2.16  | 3.62 | 1.37  | 1.93  | 1.56  | 2.14  | 1.16        | 1.17        |
| F-EMNIST-2            | –     | –     | 3.06         | <b>1.25</b> | 19.46 | 3.11 | 3.76  | 2.25  | 4.09  | 2.56  | <b>1.38</b> | 1.39        |
| F-CelebA-1            | –     | –     | <b>0.14</b>  | <b>0.82</b> | 0.18  | 3.25 | 0.20  | 1.40  | 0.37  | 1.63  | 0.17        | 0.87        |
| F-CelebA-2            | –     | –     | <b>0.17</b>  | <b>0.87</b> | 0.74  | 3.78 | 0.48  | 1.53  | 0.67  | 1.71  | 0.19        | 0.95        |
| (EMNIST, F-EMNIST-1)  | –     | –     | <b>1.26</b>  | 1.73        | 8.68  | 4.24 | 2.16  | 2.71  | 3.35  | 3.26  | 1.64        | <b>1.67</b> |
| (CIFAR 100, CelebA-1) | –     | –     | <b>1.30</b>  | <b>0.82</b> | 9.26  | 3.17 | 2.35  | 2.03  | 3.69  | 2.71  | 1.78        | 0.89        |
| <b>Average</b>        | 21.56 | 10.38 | 3.59         | 1.94        | 7.05  | 3.83 | 4.40  | 2.84  | 6.12  | 3.29  | <b>2.70</b> | <b>1.71</b> |

T(S)–Time (Second); M(G)–Memory (GB);

“–” indicates that the source codes are not provided by the baselines leading to no experimental results.

## D ADDITIONAL EXPERIMENTAL RESULTS

### D.1 Efficiency and Memory Performance Comparisons

To verify the efficiency of the proposed STIL in time and memory required for the model training, we conducted the efficiency comparison experiments in terms of the time spent per epoch, and the amount of memory used by the baselines. Note that the few methods can tackle both CF and KT, e.g.,

CAT, TRGP and CUBER, and all the OG-based methods, OWM, GPM, TRGP and CUBER, follow the same basic processing framework. The experimental results are shown in Table 5.

It is worth noting that although the proposed STIL method added the OIWS and KT processing mechanisms for its end compared with GPM, its time and space performances are better than GPM on some datasets, which is due to the optimizations by STIL made in its implementation. GPM loads in all its stored information during its computation, while our STIL loads only the information needed for computation on demand. In addition, during model training, STIL added the processing of early stop of model convergence, that is, once the convergence of model training/learning is determined, the training is immediately ended, unlike GPM, which always needs to be iteratively completed.

## D.2 ACC and BWT Performances of STIL of Task-wise vs. Layer-wise on Five Datasets

As the tasks in different datasets may have similarities, we should carry out forward KT to assist task  $t$  learning if a new task  $t$  is similar to some of the previously learned  $t-1$  tasks. Moreover, we know that layer-wise similarity may select different tasks for different layers, which provides a more fine-grained characterization of task similarity in terms of layer-level features of the model. To show the efficacy of Layer-wise task similarity comparison, we conducted the experiments for ACC and BWT performances with the standard deviation values over 5 different runs of the proposed STIL of Task-wise vs. Layer-wise on five datasets. As shown in Table 6, the Layer-wise STIL (i.e., STIL) can achieve an average ACC/BWT gain of 1.23%/0.01 over the Task-wise STIL on all five datasets, which further confirms that the similarity comparison of Layer-wise tasks is superior to that of Task-wise tasks in terms of improving ACC/BWT performances.

Table 6: ACC and BWT performances of STIL of Task-wise vs. Layer-wise on five datasets.

| Datasets           | PMNIST                  |                         | CIFAR 100               |                        | CIFAR 100 Sup           |                         | MiniImageNet            |                         | 5-Datasets              |                         |
|--------------------|-------------------------|-------------------------|-------------------------|------------------------|-------------------------|-------------------------|-------------------------|-------------------------|-------------------------|-------------------------|
|                    | 10 Tasks                |                         | 10 Tasks                |                        | 20 Tasks                |                         | 20 Tasks                |                         | 5 Tasks                 |                         |
| Methods            | ACC(%)                  | BWT                     | ACC(%)                  | BWT                    | ACC(%)                  | BWT                     | ACC(%)                  | BWT                     | ACC(%)                  | BWT                     |
| Task-wise STIL     | 95.98 $\pm$ 0.04        | -0.03 $\pm$ 0.01        | 73.98 $\pm$ 0.14        | -0.01 $\pm$ 0.01       | 59.36 $\pm$ 0.02        | -0.01 $\pm$ 0.01        | 63.99 $\pm$ 0.36        | -0.02 $\pm$ 0.01        | 92.33 $\pm$ 0.07        | -0.02 $\pm$ 0.01        |
| Layer-wise STIL    | <b>97.15</b> $\pm$ 0.03 | <b>-0.02</b> $\pm$ 0.01 | <b>75.28</b> $\pm$ 0.13 | <b>0.21</b> $\pm$ 0.00 | <b>60.78</b> $\pm$ 0.01 | <b>-0.01</b> $\pm$ 0.00 | <b>65.11</b> $\pm$ 0.31 | <b>-0.01</b> $\pm$ 0.01 | <b>93.46</b> $\pm$ 0.06 | <b>-0.01</b> $\pm$ 0.01 |
| Gain of Layer-wise | 1.17 $\pm$ 0.01         | 0.01 $\pm$ 0.00         | 1.30 $\pm$ 0.01         | 0.01 $\pm$ 0.01        | 1.42 $\pm$ 0.01         | 0.00 $\pm$ 0.01         | 1.12 $\pm$ 0.05         | 0.01 $\pm$ 0.00         | 1.13 $\pm$ 0.01         | 0.01 $\pm$ 0.00         |

## D.3 The Accuracy Evolution of Task $t$ of STIL and Baselines on a Variety of Datasets

To show the BWT and/or knowledge transfer (KT) performance of the proposed STIL and 5 strong TIL baselines of various categories, we randomly selected a task on different datasets to carry out its accuracy (denoted by Acc (%), the average ACC result of 5 different runs) evolution experiments of the task. The experimental results are shown in Tables 7-10 and Figures 2-5 demonstrate the following:

- (1) Compared with the baselines, the proposed STIL has stronger resistance to forgetting than that of the baselines while maintaining high accuracy, which is due to the proposed OIWS-based TCL strategy of STIL (see Tables 7-10 and Figures 2-5).
- (2) More interestingly, benefited from the KT with its  $\mathcal{L}_{sim}$  shown in Eq. (8), the proposed STIL has the trend of increasing accuracy instead of decreasing accuracy in terms of a task  $t$  as the number of learning tasks increases (see Tables 7-10 or Figures 4 - 5). It is worth noting that this phenomenon also appears in baselines CAT and TRGP with KT ability (see Table 10/Figure 5), which further proves the necessity and importance of KT in CL as noted in (Ke et al., 2020).

In a word, the above experimental results not only show the effectiveness of the proposed STIL in resisting forgetting and performing KT, but also verify the superiority of STIL over the baselines in ACC, BWT, and KT performances.

Table 7: ACC evolution of task 5 on PMNIST. Table 8: ACC evolution of task 1 on 5-Datasets.

| Dataset      | PMNIST      |             |             |             |             |             |
|--------------|-------------|-------------|-------------|-------------|-------------|-------------|
| Learnt Tasks | 5           | 6           | 7           | 8           | 9           | 10          |
| Method       | Acc         | Acc         | Acc         | Acc         | Acc         | Acc         |
| LwF          | 95.8        | 94.1        | 92.2        | 88.8        | 85.1        | 83.7        |
| GPM          | 97.0        | 96.4        | 95.8        | 94.8        | 94.1        | 92.5        |
| SupSup       | 91.7        | 91.7        | 91.7        | 91.7        | 91.7        | 91.7        |
| CAT          | 93.3        | 93.3        | 93.3        | 93.3        | 93.3        | 93.3        |
| TRGP         | <b>97.2</b> | <b>97.1</b> | <b>97.1</b> | <b>97.1</b> | <b>96.8</b> | <b>96.9</b> |
| STIL(Ours)   | 96.8        | 96.7        | 96.5        | 96.3        | 96.1        | 96.0        |

| Dataset      | 5-Datasets  |             |             |             |             |
|--------------|-------------|-------------|-------------|-------------|-------------|
| Learnt Tasks | 1           | 2           | 3           | 4           | 5           |
| Method       | Acc         | Acc         | Acc         | Acc         | Acc         |
| LwF          | 76.4        | 72.2        | 70.9        | 70.3        | 68.9        |
| GPM          | 76.1        | 75.7        | 72.5        | 72.6        | 72.4        |
| SupSup       | 72.3        | 71.3        | 71.3        | 71.3        | 71.3        |
| CAT          | 59.8        | 58.7        | 57.2        | 57.2        | 57.2        |
| TRGP         | 75.8        | 75.8        | 75.9        | 75.8        | 75.8        |
| STIL(Ours)   | <b>82.2</b> | <b>81.5</b> | <b>79.8</b> | <b>79.7</b> | <b>79.5</b> |

Table 9: ACC evolution of task 1 on dataset CIFAR 100.

| Dataset      | CIFAR 100   |             |             |             |             |             |             |             |             |             |
|--------------|-------------|-------------|-------------|-------------|-------------|-------------|-------------|-------------|-------------|-------------|
| Learnt Tasks | 1           | 2           | 3           | 4           | 5           | 6           | 7           | 8           | 9           | 10          |
| Method       | Acc         |
| LwF          | 75.3        | 71.8        | 71.4        | 69.7        | 68.4        | 67.6        | 64.1        | 63.4        | 59.3        | 59.4        |
| GPM          | 77.6        | 77.2        | 77.5        | 75.4        | 75.3        | 75.7        | 76.1        | 76.3        | 75.8        | 75.7        |
| SupSup       | 61.1        | 61.1        | 61.1        | 61.1        | 61.1        | 61.1        | 61.1        | 61.1        | 61.1        | 61.1        |
| CAT          | 60.2        | 60.1        | 60.2        | 60.1        | 60.1        | 60.3        | 60.1        | 60.2        | 60.1        | 60.1        |
| TRGP         | 75.8        | 75.1        | 75.1        | 74.7        | 75.5        | 75.6        | 75.9        | 75.5        | 75.4        | 75.3        |
| STIL(Ours)   | <b>78.2</b> | <b>76.7</b> | <b>77.6</b> | <b>78.4</b> | <b>78.2</b> | <b>80.1</b> | <b>77.4</b> | <b>78.1</b> | <b>79.3</b> | <b>79.2</b> |

Table 10: ACC evolution of task 6 on dataset CIFAR 100 Sup.

| Dataset      | CIFAR 100 Sup |             |             |             |             |             |             |             |             |             |             |             |             |             |             |
|--------------|---------------|-------------|-------------|-------------|-------------|-------------|-------------|-------------|-------------|-------------|-------------|-------------|-------------|-------------|-------------|
| Learnt Tasks | 6             | 7           | 8           | 9           | 10          | 11          | 12          | 13          | 14          | 15          | 16          | 17          | 18          | 19          | 20          |
| Method       | Acc           | Acc         | Acc         | Acc         | Acc         | Acc         | Acc         | Acc         | Acc         | Acc         | Acc         | Acc         | Acc         | Acc         | Acc         |
| LwF          | 59.8          | 59.6        | 60.2        | 57.2        | 57.2        | 55.8        | 56.5        | 56.2        | 53.8        | 54.8        | 55.8        | 55.2        | 55.2        | 53.6        | 52.6        |
| GPM          | 62.2          | 61.2        | 61.4        | 62.6        | 61.2        | 59.8        | 60.2        | 59.2        | 60.3        | 60.4        | 58.4        | 59.6        | 58.8        | 58.4        | 58.6        |
| SupSup       | 53.8          | 50.8        | 50.8        | 50.8        | 50.8        | 50.8        | 50.8        | 50.8        | 50.8        | 50.8        | 50.8        | 50.8        | 50.8        | 50.8        | 50.8        |
| CAT          | 51.2          | 47.5        | 47.5        | 47.5        | 47.5        | 47.5        | 47.5        | 47.5        | 47.5        | 50.2        | 50.2        | 50.2        | 50.2        | 50.2        | 50.2        |
| TRGP         | 62.6          | 62.1        | 62.4        | <b>62.2</b> | 61.6        | <b>61.6</b> | 60.2        | 61.2        | 60.4        | 60.2        | 60.4        | <b>61.2</b> | 61.8        | 61.6        | 61.2        |
| STIL(Ours)   | <b>62.8</b>   | <b>63.2</b> | <b>62.6</b> | 61.6        | <b>61.8</b> | <b>61.6</b> | <b>62.6</b> | <b>62.7</b> | <b>61.6</b> | <b>62.4</b> | <b>61.6</b> | <b>61.2</b> | <b>62.3</b> | <b>62.6</b> | <b>62.4</b> |

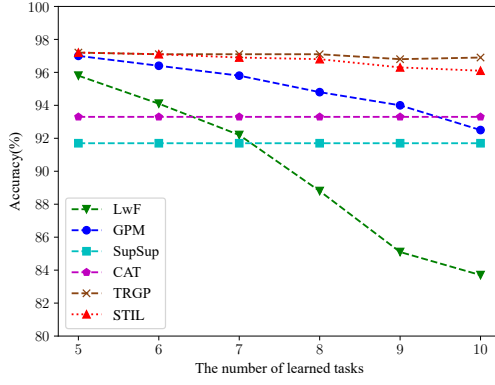

Figure 2: The diagram of the data in Table 7.

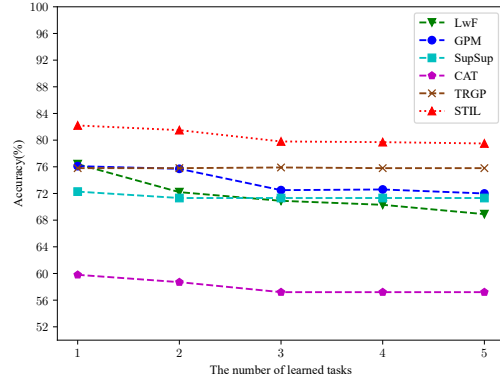

Figure 3: The diagram of the data in Table 8.

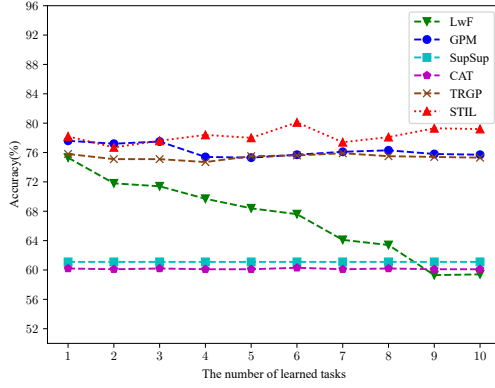

Figure 4: The diagram of the data in Table 9.

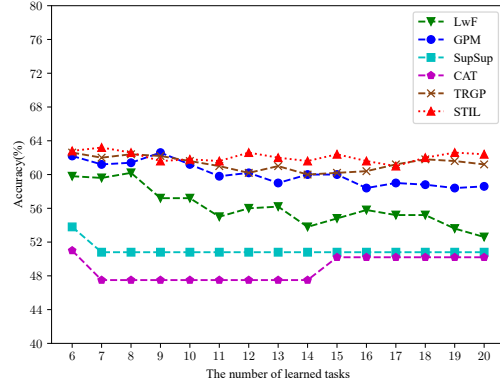

Figure 5: The diagram of the data in Table 10.

#### D.4 The KT Performance of STIL and Baselines on Mixed Tasks Datasets

Table 11: The KT performances of our STIL and 5 strong baselines with/without KT mechanisms over 5 different runs on two mixed tasks datasets.

| Dataset    | (EMNIST, F-EMNIST-1) (20 Tasks) |             |             | (CIFAR 100, F-CelebA-1) (20 Tasks) |             |             | Average      |             |             |
|------------|---------------------------------|-------------|-------------|------------------------------------|-------------|-------------|--------------|-------------|-------------|
| Methods    | ACC(%)                          | FWT(%)      | BWT(%)      | ACC(%)                             | FWT(%)      | BWT(%)      | ACC(%)       | FWT(%)      | BWT(%)      |
| ONE        | <b>77.44</b>                    | None        | None        | <b>64.50</b>                       | None        | None        | <b>70.97</b> | None        | None        |
| GPM        | 73.69 $\pm$ 0.32                | -3.65       | <b>0.38</b> | 64.28 $\pm$ 0.28                   | 0.13        | -0.37       | 68.99        | -1.89       | <b>0.01</b> |
| HAT        | 70.70 $\pm$ 0.18                | -6.26       | 0.00        | 56.82 $\pm$ 0.13                   | -7.68       | <b>0.00</b> | 63.76        | -6.77       | 0.00        |
| CAT        | 74.61 $\pm$ 0.19                | -0.45       | -2.19       | 61.94 $\pm$ 0.16                   | -2.56       | <b>0.00</b> | 68.28        | -1.51       | -1.10       |
| TRGP       | 75.53 $\pm$ 0.28                | 0.12        | -1.36       | 61.92 $\pm$ 0.21                   | -1.17       | -1.55       | 68.73        | -0.48       | -1.46       |
| CUBER      | <b>77.23</b> $\pm$ 0.28         | <b>0.53</b> | -0.73       | <b>64.85</b> $\pm$ 0.31            | <b>1.09</b> | -0.73       | <b>71.04</b> | <b>0.81</b> | -0.73       |
| STIL(Ours) | <b>78.01</b> $\pm$ 0.23         | 0.16        | <b>0.43</b> | <b>65.46</b> $\pm$ 0.14            | <b>1.23</b> | <b>0.33</b> | <b>71.74</b> | 0.70        | <b>0.38</b> |

<sup>1</sup> ONE – building a model for each task independently using a separate neural network, which has no knowledge transfer and no forgetting involved (denoted as None). The backbone 3-Layer FCN is used in all baselines on the two mixed tasks datasets. The **blue results** mean the best prior results.

The experimental results shown in Table 11 demonstrates that the performance of STIL’s ACC, FWT and BWT are superior to those of five strong baselines on two mixed data sets, which fully verifies the effectiveness of STIL’s forgetting elimination and KT mechanism.

#### D.5 The Number of Learnable Tasks of STIL and OG-based OWM

Figure 6 shows the number of learnable tasks of STIL and OG-based OWM, respectively.

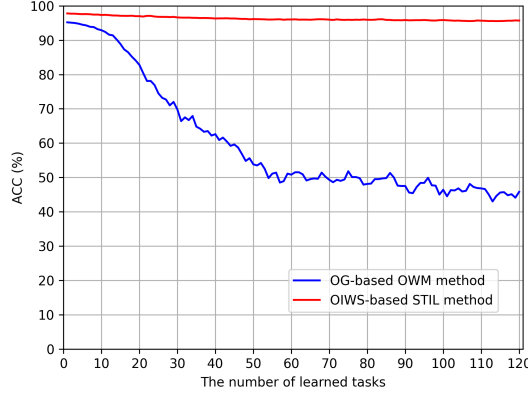

Figure 6: Accuracy changes as the number of learned tasks increasing for OWM and STIL.

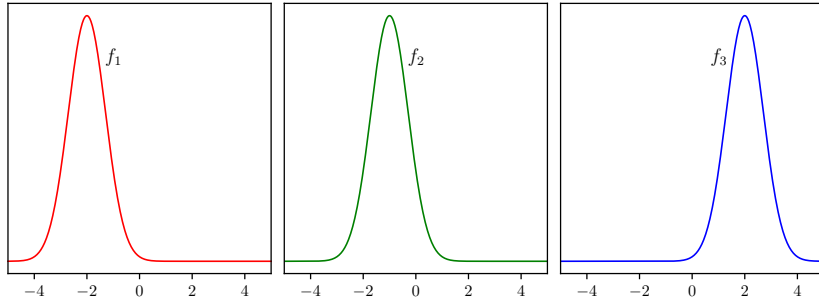

Figure 7: The schematic diagram of the difference between Euclidean distance and Wasserstein distance. The figure shows three distributions  $f_1$ (red),  $f_2$ (green) and  $f_3$ (blue). Each pair has the same distance in the Euclidean space. But in the Wasserstein space,  $f_1$  and  $f_2$  are closer as the shapes/geometries of  $f_1$  and  $f_2$  are more similar overall.

| ONE ACC Performance on 5-Datasets  |       |       |       |       |              |         |  |
|------------------------------------|-------|-------|-------|-------|--------------|---------|--|
| T1                                 | T2    | T3    | T4    | T5    | ACC (%)      |         |  |
| 79.86                              | 99.43 | 99.41 | 94.83 | 94.37 | <b>93.58</b> |         |  |
| STIL ACC Performance on 5-Datasets |       |       |       |       |              |         |  |
| 79.10                              |       |       |       |       |              |         |  |
| 79.10                              | 99.30 |       |       |       |              |         |  |
| 79.10                              | 99.30 | 99.30 |       |       |              |         |  |
| 79.10                              | 99.30 | 99.30 | 94.57 |       | ACC (%)      | BWT (%) |  |
| 79.10                              | 99.30 | 99.30 | 94.52 | 95.10 | 93.46        | -0.01   |  |

| ONE ACC Performance on 5-Datasets   |       |       |       |       |              |         |  |
|-------------------------------------|-------|-------|-------|-------|--------------|---------|--|
| T1                                  | T2    | T3    | T4    | T5    | ACC (%)      |         |  |
| 79.86                               | 99.43 | 99.41 | 94.83 | 94.37 | <b>93.58</b> |         |  |
| CUBER ACC Performance on 5-Datasets |       |       |       |       |              |         |  |
| 79.10                               |       |       |       |       |              |         |  |
| 79.10                               | 99.30 |       |       |       |              |         |  |
| 79.10                               | 99.30 | 98.12 |       |       |              |         |  |
| 79.10                               | 99.30 | 98.12 | 92.15 |       | ACC (%)      | BWT (%) |  |
| 79.10                               | 99.30 | 98.12 | 92.60 | 90.64 | 91.95        | 0.03    |  |

Figure 8: The ACC performance of the proposed STIL and CUBER from Table 1 on 5-Datasets.
